# Supplementary material for: LLDAS (lupus low disease activity state) and/or remission are associated with less damage accrual in patients with systemic lupus erythematosus from a primarily Mestizo population: data from the Almenara Lupus Cohort
Source: PubMed Central journal article supplement — Lupus Sci Med. 2022 Feb 22;9(1):e000616. doi: 10.1136/lupus-2021-000616 (PMC8867305; doi:10.1136/lupus-2021-000616), 2022-02-22
Supplement: lupus-2021-000616supp001.pdf [file lupus-2021-000616supp001.pdf]

Supplementary Table 1: Duration of remission and LLDAS during the follow-up

|        | Remission  | LLDAS       |
|--------|------------|-------------|
| 0%     | 81 (28.8%) | 56 (19.9%)  |
| 1-25%  | 15 (5.3%)  | 10 (3.6%)   |
| 25-50% | 50 (17.8%) | 36 (12.8%)  |
| 50-75% | 37 (13.2%) | 34 (12.1%)  |
| >75%   | 98 (34.9%) | 145 (51.6%) |

LLDAS: Lupus low disease activity state
